# Supplementary material
Source: PubMed Central journal article supplement (PMC5501484)
Supplement: NIHMS873599-supplement-Supplemental_Figures.pdf [file NIHMS873599-supplement-Supplemental_Figures.pdf]

## Supplement Material

### **Tissue factor prothrombotic activity is regulated by integrin-arf6 trafficking**

Andrea S. Rothmeier<sup>1</sup>, Patrizia Marchese<sup>2</sup>, Florian Langer<sup>3</sup>, Yuichi Kamikubo<sup>2</sup>, Florence Schaffner<sup>1</sup>, Joseph Cantor<sup>4</sup>, Mark H. Ginsberg<sup>4</sup>, Zaverio M. Ruggeri<sup>2</sup>, and Wolfram Ruf<sup>1,5</sup>

<sup>1</sup>Department of Immunology and Microbiology and <sup>2</sup>Molecular Medicine, The Scripps Research Institute, La Jolla, CA; <sup>3</sup>II. Medical Clinic and Polyclinic, University Medical Center Eppendorf, Hamburg, Germany; <sup>4</sup>Department of Medicine, University of California San Diego, La Jolla, CA; <sup>5</sup>Center for Thrombosis and Hemostasis, Johannes Gutenberg University Medical Center, Mainz, Germany.

Supplemental Figures

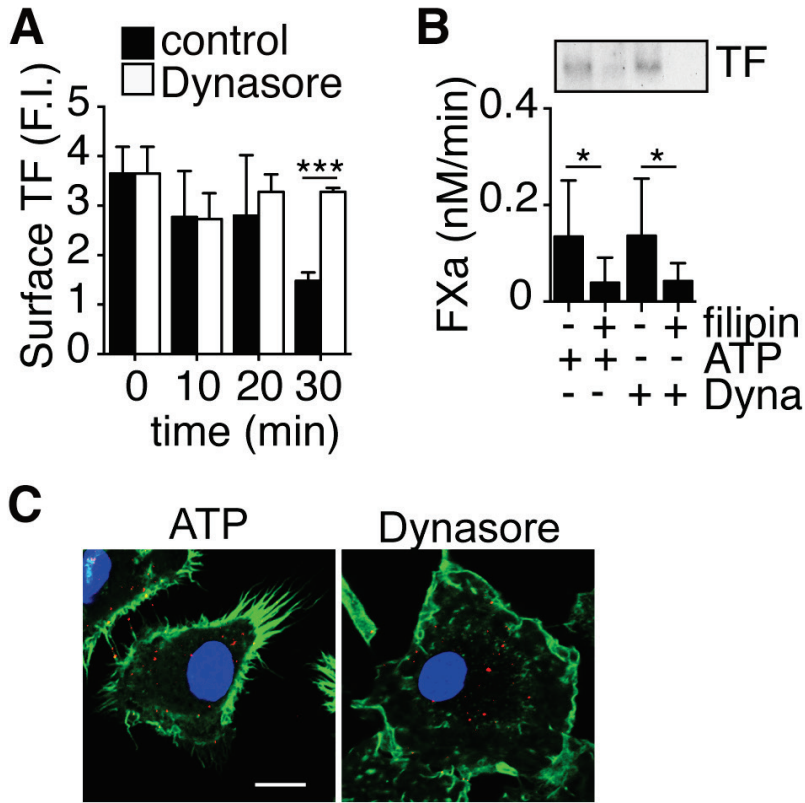

**Figure I. Dynasore- and mastoparan- stimulated TF<sup>+</sup> MP release.** **A**, FACS detection of cell surface TF on macrophages kept for the indicated times in assay buffer in absence (control, closed bars) or presence (open bars) of Dynasore; \*\*\* $p < 0.001$ ,  $t$ -test,  $n=3$ . **B**, Effect of filipin treatment on the release of procoagulant TF<sup>+</sup> MP from ATP- and Dynasore-stimulated cells: Western blot of TF on MP (upper panel) and determination of procoagulant TF MP activity by FXa generation assay (lower panel); \* $p < 0.05$  paired  $t$ -test,  $n=6$ . Pairing efficiency test: ATP  $r=0.7716$ , \* $p < 0.0361$ , and Dynasore  $r=0.922$ , \*\* $p=0.0069$ . **C**, Macrophages treated for 20 minutes with ATP or Dynasore were stained for F-actin (phalloidin-Alexa488, green), TF ( $\alpha$ TF-Alexa647, red) and nuclei (Hoechst, blue). Images were taken on a Zeiss LSM 710 with a 63x Plan-Apochromat NA 1.4 WD 190 mm oil emersion objective and processed using Image Browser Software; scale bar = 10  $\mu$ m.

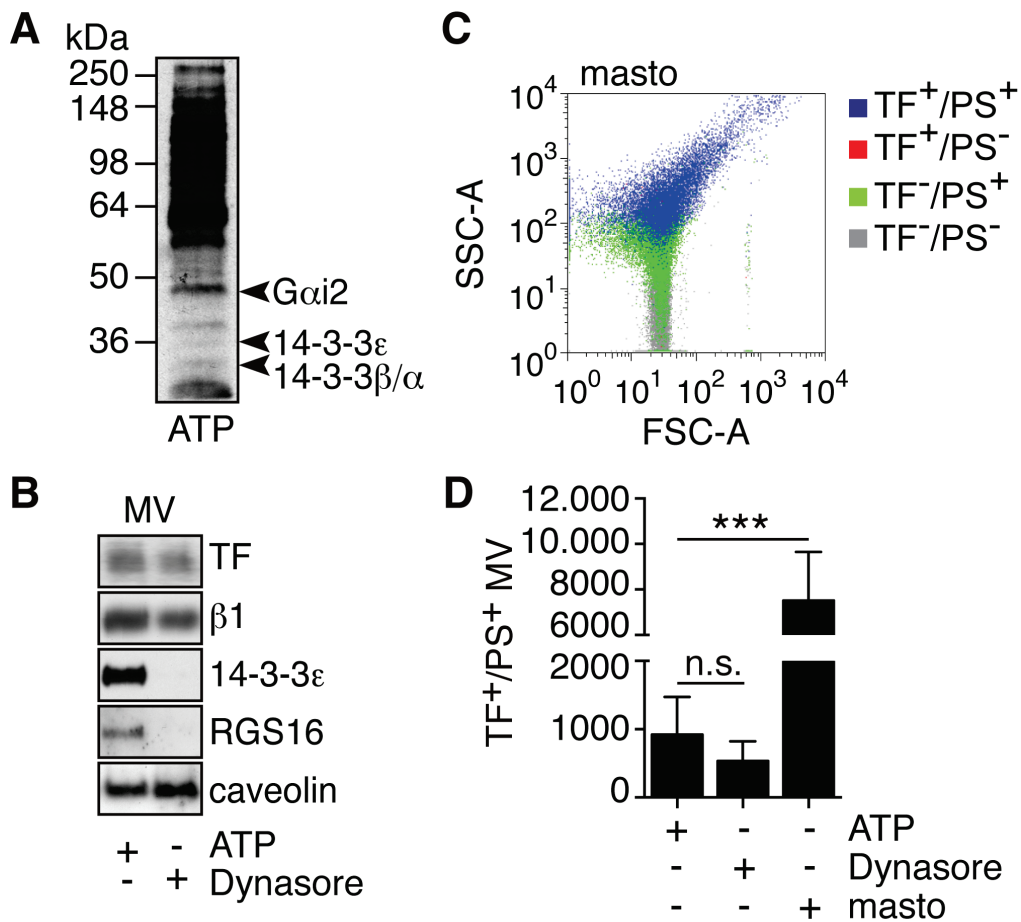

**Figure II. ATP and mastoparan stimulate the release of  $G\alpha_{i2}$  and  $TF^+$  MP.** **A**, RAW 264.7 macrophage MV thiol-proteome was labeled with MPB and detected by streptavidin blot. **B**, Representative Western blots of TF, integrin  $\beta 1$ , 14-3-3 $\epsilon$ , RGS16 and caveolin on ATP- or Dynasore-induced MV. **C**, FACS detection of TF- and PS-labeled MV from mastoparan-stimulated cells. **D**, Count of  $TF^+$   $PS^+$  MP released from macrophages stimulated for 30 minutes with ATP, Dynasore or mastoparan; \*\*\* $p < 0.001$  ANOVA (Tukey's),  $n=6$ .

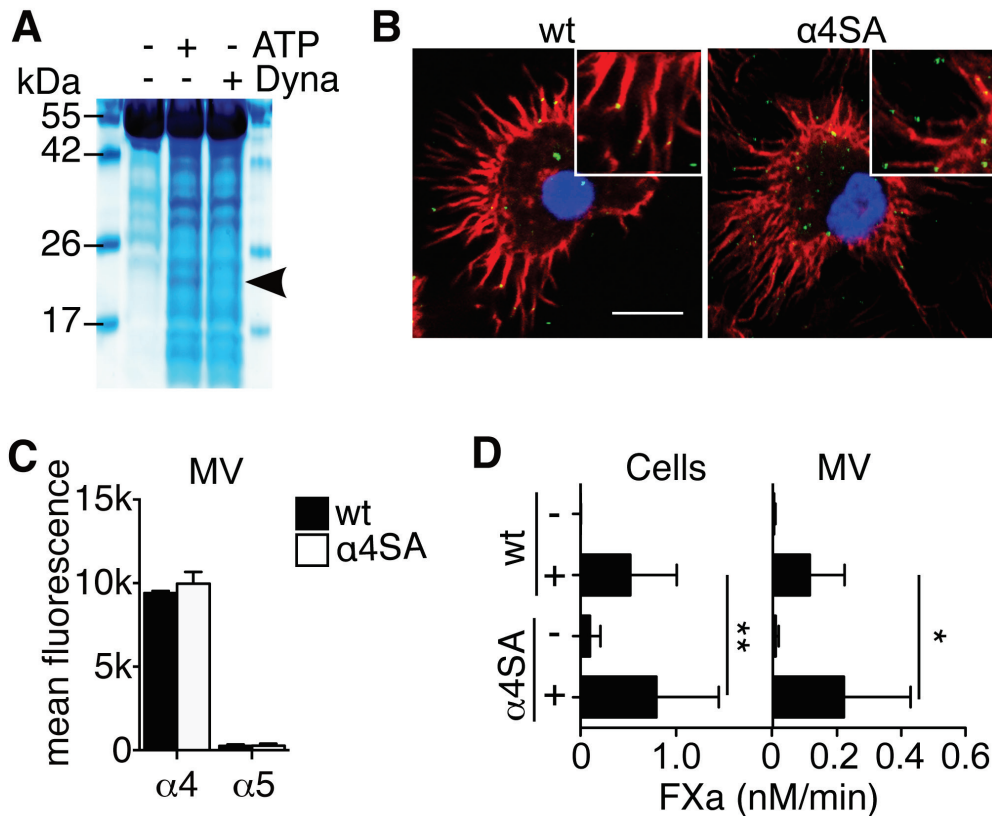

**Figure III. Arf6 regulation of TF.** **A**, Coomassie detection of proteins in supernatants from control, ATP and Dynasore-treated cells. The arrowhead indicates the protein band subjected to mass spectrometry. **B**, Filopodia formation and TF localization in control and ATP-stimulated wild-type (wt) and  $\alpha 4SA$  macrophages. Cell surface TF was labeled with immuno-purified rabbit anti-mouse TF antibody and detected with anti-rabbit-Alexa488 (green). Fixed cells were counterstained for F-actin (phalloidin-Alexa633, red) and nuclei (Hoechst, blue). Inserts show magnification of filopodia. Images were taken on a Zeiss LSM 710 with a 63x Plan-Apochromat NA 1.4 WD 190 mm oil emersion objective and processed using Image Browser Software; scale bar = 10  $\mu$ m. **C**, Integrin  $\alpha 4$  and integrin  $\alpha 5$  on ATP-induced MP released from wt (open bars) or  $\alpha 4SA$  macrophages (closed bars), determined by FACS staining. **D**, FXa generation of cells and MP from ATP-stimulated wild-type or  $\alpha 4SA$  macrophages; \* $p < 0.05$ , \*\* $p < 0.001$ , paired  $t$ -test,  $n = 14$ . Pairing efficiency test: cells  $r = 0.9251$ , \*\*\* $p < 0.0001$ , and MP  $r = 0.7104$ , \*\* $p = 0.0022$ .

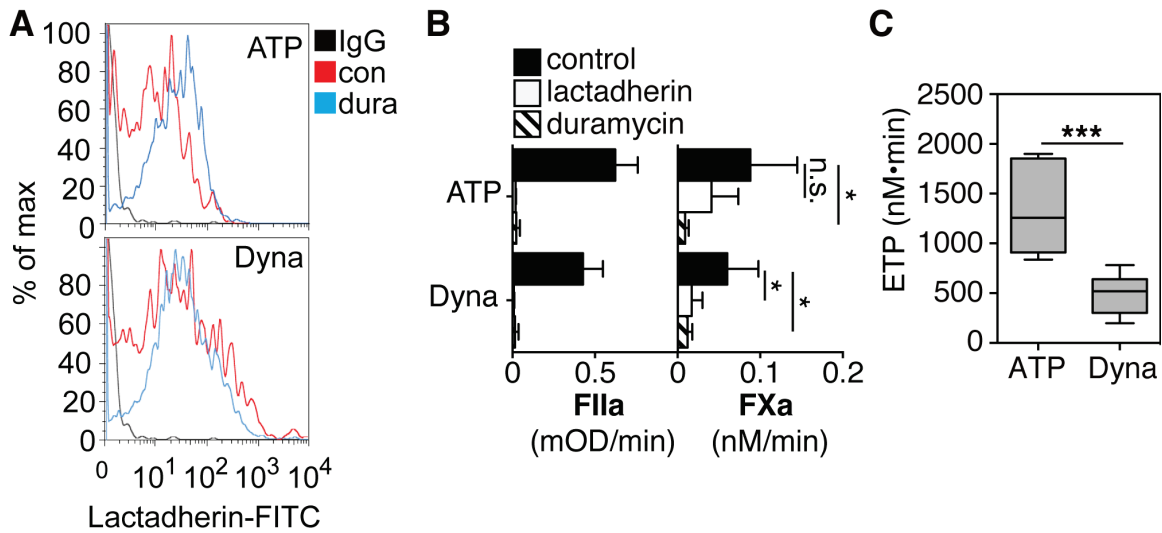

**Figure IV: Prothrombotic properties of MP.** **A**, FACS analysis of ATP- or Dynasore-induced MP treated with PE-binding duramycin (1  $\mu$ M) and stained with PS-binding Lactadherin-FITC, or IgG Alexa488. **B**, Prothrombinase activity (left panel) and FXa generation measured with 2 nM FVIIa (right panel) on MP from ATP- or Dynasore-induced MP in the presence of duramycin (1  $\mu$ M) or lactadherin (50 nM),  $*p < 0.05$ , ANOVA (Turkey's),  $n = 3$ . **C**, Quantification of endogenous thrombin potential (ETP) from curves as shown in Figure 4D,  $n = 3$ ,  $***p < 0.001$  t-test.
