# Supplementary material
Source: PubMed Central journal article supplement (PMC5501484)

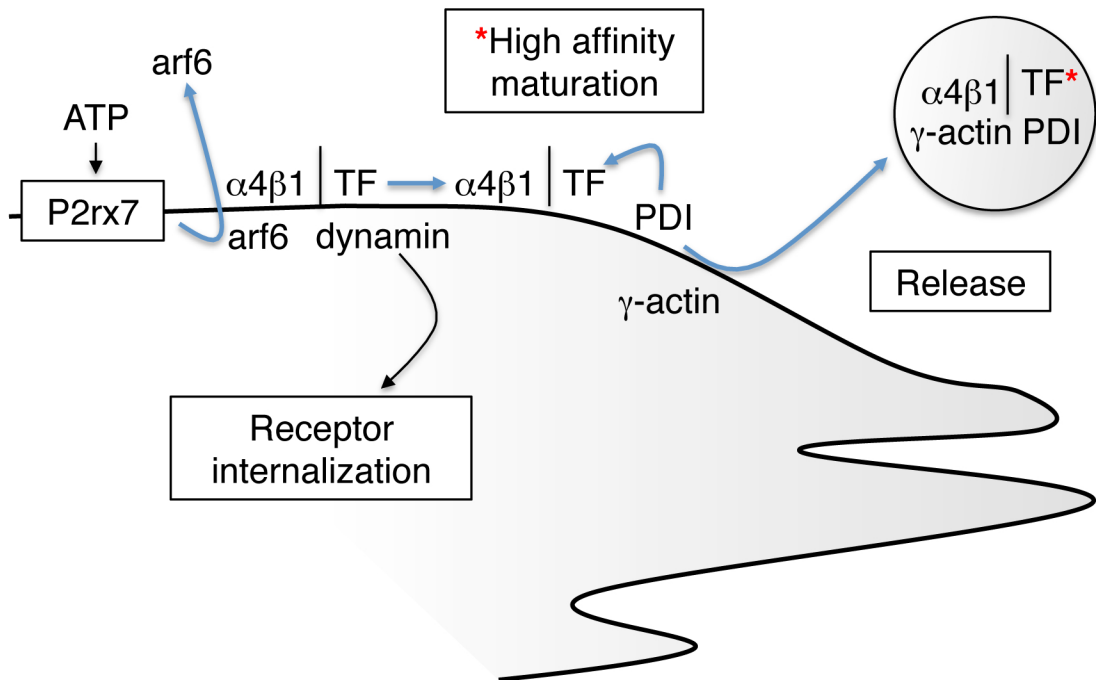

Supplement: NIHMS873599-supplement-Graphic_Abstract.pdf [file NIHMS873599-supplement-Graphic_Abstract.pdf]
